# Supplementary figures and images for: Insect-mediated valorisation of anaerobically digested aquaculture waste: bioconversion performances, nutritional composition and microbial safety of black soldier fly larvae
Source: Royal Society of Chemistry journal article supplement (doi:10.1039/d4fb00392f), 2025-01-01

**S2.** Regression analyses between ASW weight in initial diet (g) and final larval weight (mg).

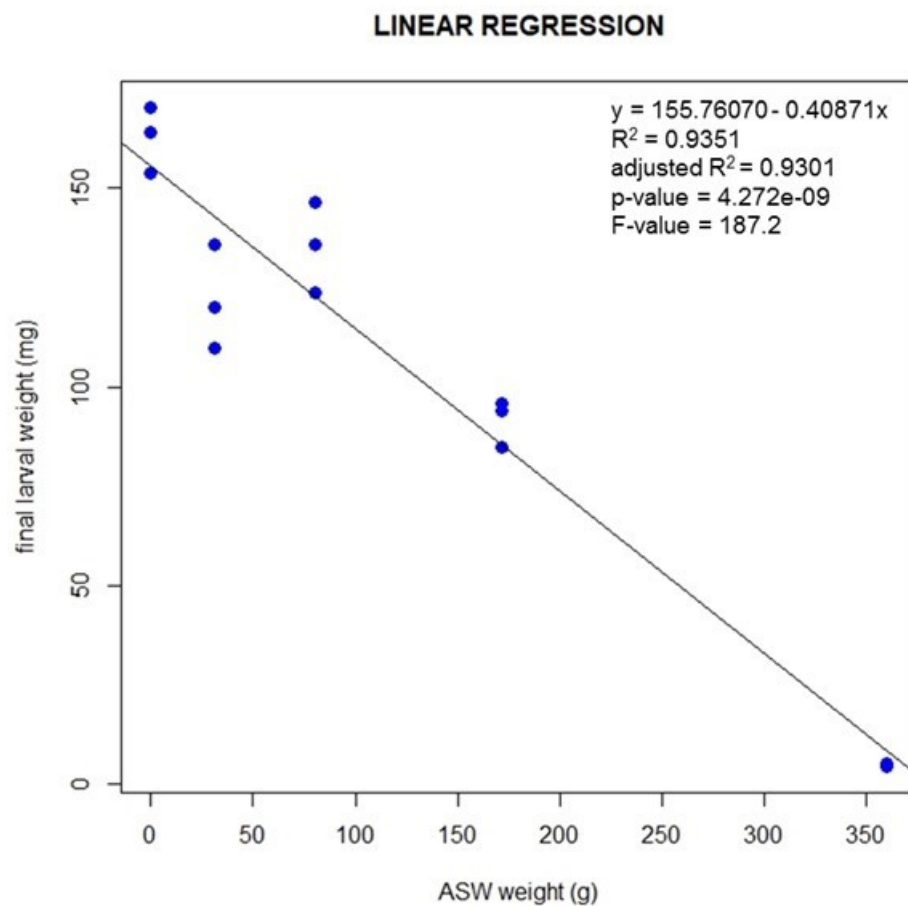

Supplement: d4fb00392f4.pdf [file d4fb00392f4.pdf]
